# Supplementary material for: Amidoxime-modified chitosan for pigment red 224 enrichment through reversible assembly
Source: Royal Society of Chemistry journal article supplement (doi:10.1039/c7nj04024e), 2017-12-15
Supplement: c7nj04024e1.pdf [file c7nj04024e1.pdf]

# Amidoxime-Modified Chitosan for Pigment Red 224 Enrichment through Reversible Assembly

Shaohua Gou,<sup>\*, †</sup> Yanting Zhou,<sup>†</sup> Ming Duan,<sup>\*, †</sup> Chuan Peng,<sup>†</sup> Xiaoyan Yang<sup>†</sup> and Jin Wang<sup>†</sup>

<sup>†</sup> Oil and Gas Field Applied Chemistry Key Laboratory of Sichuan Province, Southwest Petroleum University, Chengdu 610500, P. R. China

\*E-mail: [shaohuagou@swpu.edu.cn](mailto:shaohuagou@swpu.edu.cn) (S.G.); [swpua124@126.com](mailto:swpua124@126.com) (M.D.)

|                                                                                        |          |
|----------------------------------------------------------------------------------------|----------|
| <b>1. Solubility of AO/MAC-CTS adsorbent in different solvents..</b>                   | <b>2</b> |
| <b>2. XPS analyses of typical materials .....</b>                                      | <b>2</b> |
| <b>3. The effect of pH on the enrichment of pigment red 224 .....</b>                  | <b>3</b> |
| <b>4. Interaction between AO/MAC-CTS and pigment red 224 .....</b>                     | <b>3</b> |
| <b>5. Comparison of dye adsorption performance with other advanced materials .....</b> | <b>4</b> |
| <b>6. References .....</b>                                                             | <b>9</b> |

## 1. Solubility of AO/Mac-CTS adsorbent in different solvents

Table S1. The condition of AO/Mac-CTS in different solvent environment.

| Solvents        | Solubility status | Solvents                        | Solubility status |
|-----------------|-------------------|---------------------------------|-------------------|
| Distilled water | No                | CH <sub>2</sub> Cl <sub>2</sub> | No                |
| 5% aq. NaOH     | No                | DMF                             | No                |
| 5% aq. HCl      | No                | DMSO                            | No                |
| methanol        | No                | pyridine                        | No                |

## 2. XPS analyses of typical materials

Table S2. The XPS spectra information of AN/Mac-CTS and AO/Mac-CTS.

|            | Element | Binding Energy(eV) | Assignment                                                                                                                                       | Reference |
|------------|---------|--------------------|--------------------------------------------------------------------------------------------------------------------------------------------------|-----------|
| AN/Mac-CTS | C 1s    | 285.50             | C-H, C-C,<br>CH <sub>2</sub> -CH <sub>2</sub> -C≡N                                                                                               | 1-2       |
|            |         | 286.63             | CH <sub>2</sub> -C≡N, CH <sub>2</sub> -C≡N                                                                                                       |           |
|            |         | 287.72             | C=O                                                                                                                                              |           |
|            | N 1s    | 399.68             | C≡N                                                                                                                                              | 1         |
|            |         | 402.10             | -NH <sub>3</sub> <sup>+</sup>                                                                                                                    | 2         |
| AO/Mac-CTS | C 1s    | 284.92             | CH <sub>2</sub> -CH <sub>2</sub> -C(NH <sub>2</sub> )=NOH,<br>CH <sub>2</sub> -C(NH <sub>2</sub> )=NOH,<br>CH <sub>2</sub> -CH <sub>2</sub> -C≡N | 1-2       |
|            |         | 286.33             | CH <sub>2</sub> -C≡N, CH <sub>2</sub> -C≡N,<br>C-O                                                                                               |           |
|            |         | 287.44             | CH <sub>2</sub> -C(NH <sub>2</sub> )=NOH,<br>N-C=O                                                                                               |           |
|            | N 1s    | 399.44             | NH <sub>2</sub> -C=N-OH, C≡N                                                                                                                     | 1         |
|            |         | 400.74             | NH <sub>2</sub> -C=N-OH                                                                                                                          |           |

### 3. The effect of pH on the enrichment of pigment red 224

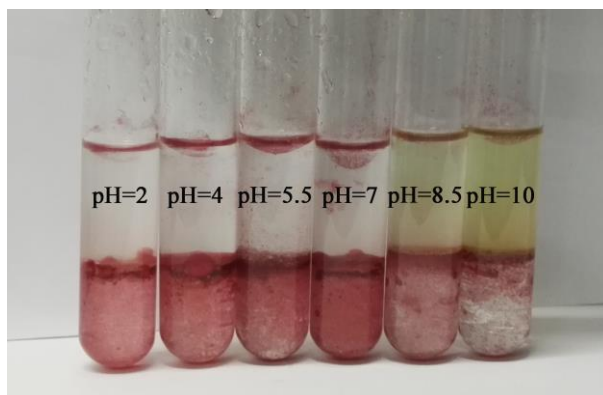

Fig. S1. The effect of pH on the enrichment of pigment red 224. The experiment condition are that  $n(\text{Pigment red 224}):n(\text{AO/Mac-CTS}) = 1:4$  and  $T=20\text{ }^\circ\text{C}$ .

### 4. Interaction between AO/Mac-CTS and pigment red 224

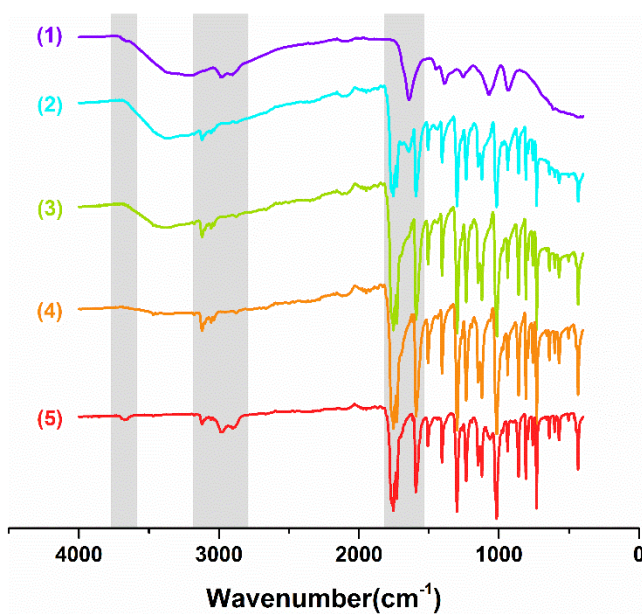

Fig. S2. FTIR spectra of AO/Mac-CTS (1), pigment red 224 adsorbed on AO/Mac-CTS in varying mole ratio ( $n(\text{AO/Mac-CTS}):n(\text{Pigment red 224}) = 6:1, 1:1$  and  $1:6$  corresponding to (2) - (4) respectively, and pigment red 224 (5).

## 5. Comparison of dye adsorption performance with other advanced materials

Table S3. Comparison with typical state-of-the-art materials for the treatment of cationic, anionic and neutral dyes which are similar with the structure of PTCDA.

| Sample                                                                                                                                                                                                 | Solvent | Dye object                                                                                                    | T (°C)                | pH | Q <sub>e</sub> (mg/g) | Ref. |
|--------------------------------------------------------------------------------------------------------------------------------------------------------------------------------------------------------|---------|---------------------------------------------------------------------------------------------------------------|-----------------------|----|-----------------------|------|
| Magnetic multi-wall carbon nanotube nanocomposite                                                                                                                                                      | -       | 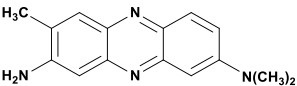 <p>Neutral Red</p>        | 25                    | 7  | 20.51                 | 3    |
| Activated carbon prepared by burning-off powder medium density fibreboard with 33min                                                                                                                   | Water   |                                                                                                               | 25                    | 5  | 50                    | 4    |
| Metal-organic framework [(CH <sub>3</sub> ) <sub>2</sub> NH <sub>2</sub> ] <sub>2</sub> [Cu <sub>3</sub> O(SO <sub>4</sub> ) <sub>3</sub> Cu <sub>2</sub> L <sub>2</sub> (DMF)(H <sub>2</sub> O)]·9DMF | Ethanol |                                                                                                               | Room temperature (RT) | -  | 132                   | 5    |
| Fe <sub>3</sub> O <sub>4</sub> nanoparticles                                                                                                                                                           | Water   |  <p>Safranin O</p>         | 30                    | 6  | 96.94                 | 6    |
| Cucurbit[6]uril                                                                                                                                                                                        | DMF     |  <p>Reactive Blue 19</p> | 25                    | 7  | 100.5                 | 7    |
| Glycidyl methacrylate- modified chitosan radically copolymered with methyl methacrylate                                                                                                                | Water   |                                                                                                               | 30                    | 7  | 189                   | 8    |

Continued Table S3

| Sample                                                                                                      | Solvent | Dye object                                                                                                 | T (°C) | pH  | Q <sub>e</sub> (mg/g) | Ref. |
|-------------------------------------------------------------------------------------------------------------|---------|------------------------------------------------------------------------------------------------------------|--------|-----|-----------------------|------|
| Microalgae immobilized by polysulfone nanofibrous web                                                       | Water   | 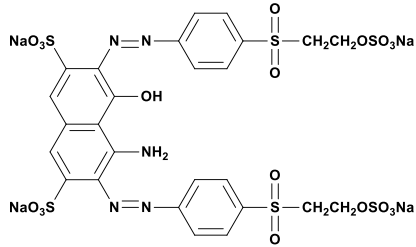 <p>Remazol Black 5</p> | 23     | 6   | 36.5                  | 9    |
| Cross-linked amino-starch                                                                                   | Water   |                                                                                                            | 25     | 4   | 245.42                | 10   |
| Magnetic nanoparticles modified with aminoguanidine                                                         | Water   |  <p>Acid Green 25</p>   | 25     | 1.3 | 121.1                 | 11   |
| Phase-selective gelators methyl 4,6-O-[(4-methylphenyl)methylene]-2,3-di-O-hexadecanoyl-α-D-glucopyranoside | Water   |  <p>Rhodamine B</p>   | RT     | -   | 24                    | 12   |

Continued Table S3

| Sample                                           | Solvent | Dye object                                                                                                 | T (°C) | pH | Q <sub>e</sub> (mg/g) | Ref. |
|--------------------------------------------------|---------|------------------------------------------------------------------------------------------------------------|--------|----|-----------------------|------|
| Graphene oxide-chitosan hydrogel                 | Water   | 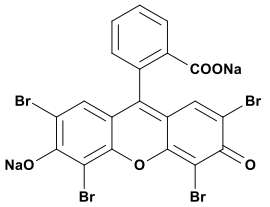 <p>Eosin Y</p>         | 21     | 7  | 326                   | 13   |
| Hyperbranched poly(ether amine) nanogel/chitosan | Water   |  <p>Fluorescein</p>     | 25     | -  | 2.39                  | 14   |
| Amidoximated poly(acrylonitrile) particles       | Water   |  <p>Methylene Blue</p>  | RT     | -  | 90.53                 | 15   |
|                                                  |         |  <p>Rhodamine 6 G</p> |        |    | 74.17                 |      |

Continued Table S3

| Sample                         | Solvent | Dye object                                                                                                 | T (°C) | pH | Q <sub>e</sub> (mg/g) | Ref. |
|--------------------------------|---------|------------------------------------------------------------------------------------------------------------|--------|----|-----------------------|------|
| Starch/acrylonitrile-amidoxime | Water   | 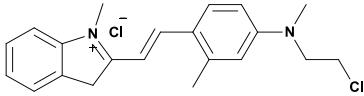 <p>Basic Violet 7</p>  | 25     | 7  | 7.3                   | 16   |
|                                |         |  <p>Basic Blue 3</p>    |        |    | 7.2                   |      |
|                                |         |  <p>Direct Yellow 50</p> |        |    | 2.1                   |      |
|                                |         |  <p>Acid Red 37</p>    |        |    | 3.1                   |      |

Continued Table S3

| Sample     | Solvent                                | Dye object                                                                                   | T (°C) | pH | Q <sub>e</sub> (mg/g) | Ref.      |
|------------|----------------------------------------|----------------------------------------------------------------------------------------------|--------|----|-----------------------|-----------|
| AO/Mac-CTS | H <sub>2</sub> O<br>-CHCl <sub>3</sub> | 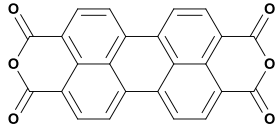<br>PTCDA | 10     | 7  | 315.79                | This work |



## 6. References

- (1) Zhao, Y.; Wang, X.; Li, J.; Wang, X. K., Amidoxime functionalization of mesoporous silica and its high removal of U(VI). *Polym. Chem.* **2015**, *6* (30), 5376-5384.
- (2) Ho, T. T.; Bremmell, K. E.; Krasowska, M.; Stringer, D. N.; Thierry, B.; Beattie, D. A., Tuning polyelectrolyte multilayer structure by exploiting natural variation in fucoidan chemistry. *Soft Matter* **2015**, *11* (11), 2110-2124.
- (3) Gong, J. L.; Wang, B.; Zeng, G. M.; Yang, C. P.; Niu, C. G.; Niu, Q. Y.; Zhou, W. J.; Liang, Y., Removal of cationic dyes from aqueous solution using magnetic multi-wall carbon nanotube nanocomposite as adsorbent. *J. Hazard. Mater.* **2009**, *164* (2–3), 1517-1522.
- (4) Gomes, J. A. F. L.; Azaruja, B. A.; Mourão, P. A. M., From MDF and PB wastes to adsorbents for the removal of pollutants. *Appl. Surf. Sci.* **2016**, *380*, 119-126.
- (5) Yao, S.; Xu, T.; Zhao, N.; Zhang, L.; Huo, Q.; Liu, Y., An anionic metal-organic framework with ternary building units for rapid and selective adsorption of dyes. *Dalton Trans.* **2017**, *46*, 3332-3337.
- (6) Ghaedi, M.; Hajjati, S.; Mahmudi, Z.; Tyagi, I.; Agarwal, S.; Maity, A.; Gupta, V. K., Modeling of competitive ultrasonic assisted removal of the dyes – Methylene blue and Safranin-O using Fe<sub>3</sub>O<sub>4</sub> nanoparticles. *Chem. Eng. J.* **2015**, *268*, 28-37.
- (7) Xie, X.; Li, X.; Luo, H.; Lu, H.; Chen, F.; Li, W., The Adsorption of Reactive Blue 19 Dye onto Cucurbit[8]uril and Cucurbit[6]uril: An Experimental and Theoretical Study. *J. Phys. Chem. B* **2016**, *120* (17), 4131-4142.
- (8) Jiang, X.; Sun, Y.; Liu, L.; Wang, S.; Tian, X., Adsorption of C.I. Reactive Blue 19 from aqueous solutions by porous particles of the grafted chitosan. *Chem. Eng. J.* **2014**, *235*, 151-157.
- (9) Keskin, N. O. S.; Celebioglu, A.; Uyar, T.; Tekinay, T., Microalgae Immobilized by Nanofibrous Web for Removal of Reactive Dyes from Wastewater. *Ind. Eng. Chem. Res.* **2015**, *54* (21), 5802-5809.

- (10) Cheng, R. M.; Ou, S. J.; Li, M. J.; Li, Y. J.; Xiang, B., Ethylenediamine modified starch as biosorbent for acid dyes. *J. Hazard. Mater.* **2009**, *172* (2–3), 1665-1670.
- (11) Li, D. P.; Zhang, Y. R.; Zhao, X. X.; Zhao, B. X., Magnetic nanoparticles coated by aminoguanidine for selective adsorption of acid dyes from aqueous solution. *Chem. Eng. J.* **2013**, *232* (10), 425-433.
- (12) Zhang, X.; Song, J.; Ji, W.; Xu, N.; Gao, N.; Zhang, X.; Yu, H., Phase-selective gelators based on closed-chain glucose derivatives: their applications in the removal of dissolved aniline/nitrobenzene, and toxic dyes from contaminated water. *J. Mater. Chem. A* **2015**, *3* (37), 18953-18962.
- (13) Chen, Y.; Chen, L.; Bai, H.; Li, L., Graphene oxide-chitosan composite hydrogels as broad-spectrum adsorbents for water purification. *J. Mater. Chem. A* **2013**, *1* (6), 1992-2001.
- (14) Li, J.; Su, Z.; Xu, H.; Ma, X.; Yin, J.; Jiang, X., Supramolecular Networks of Hyperbranched Poly(ether amine) (hPEA) Nanogel/Chitosan (CS) for the Selective Adsorption and Separation of Guest Molecules. *Macromolecules* **2015**, *48*, 2022-2029.
- (15) Ajmal, M.; Demirci, S.; Siddiq, M.; Aktas, N.; Sahiner, N., Amidoximated poly(acrylonitrile) particles for environmental applications: Removal of heavy metal ions, dyes, and herbicides from water with different sources. *J. Appl. Polym. Sci.* **2016**, *133* (7), 43032-43043.
- (16) Abdelaal, S. E.; Gad, Y. H.; Dessouki, A. M., Use of rice straw and radiation-modified maize starch/acrylonitrile in the treatment of wastewater. *J. Hazard. Mater.* **2006**, *129* (1–3), 204-215.
